# Supplementary material
Source: HighWire-hosted journal article supplement (https://bmjopenquality.bmj.com/highwire/filestream/135999/field_highwire_adjunct_files/2/ds4741.pdf)
Supplement: ds4741.pdf [file ds4741.pdf]

Team D

## SOUTHMEAD ELECTIVE ORTHOPAEDICS

|                |                                                 |
|----------------|-------------------------------------------------|
| MRN            | 123456                                          |
| First Name     | Minnie                                          |
| Surname        | Mouse                                           |
| DOB            | 23/12/1988                                      |
| Ward           | 25b                                             |
| Bed            | 12                                              |
| Consultant     | Riddick                                         |
| Op date        | 09/12/2014                                      |
| Operation      | Right DHS                                       |
| Current issues | Low HB, transfused,                             |
| Xrays          | Il in op                                        |
| Bloods         | Hb 74 post op, now 92, Pl 220, U&E NAD 10/12/14 |
| Jobs           | Check Hb 12/12/14, TTA [ ]                      |
| TTA            | <input type="checkbox"/>                        |

Navigate

All Patients

Team A

Team B

Team C

Team D

Add new  
patientReturn to  
front pageDischarge Pt  
(Double click)

Lists for printing

All Patients

Team A

Team B

Team C

Team D

Weekend  
reviews req

By Consultant

Save and Exit  
(Double click)

MRN First Name Surname DOB Ward Bed Consultant

Minnie Mouse inserted for demonstration, all other data covered for anonymity but would be displayed as per Minnie below:

|        |        |       |            |     |    |  |
|--------|--------|-------|------------|-----|----|--|
| 123456 | Minnie | Mouse | 23/12/1988 | 25b | 12 |  |
|--------|--------|-------|------------|-----|----|--|

Record: 14 of 15 Unfiltered Search

Hepple, Porteous, Baker, Amirfeyz, Davies, Lines, Mitchell, Eastaugh-Waring, Blom

Ward 26a

|    |                                                     |                                              |                |                                                               |                                                                    |                                         |
|----|-----------------------------------------------------|----------------------------------------------|----------------|---------------------------------------------------------------|--------------------------------------------------------------------|-----------------------------------------|
| 7  | Surname, firstname<br>dd/mm/yyyy<br>Hospital number | Consultant<br>Operation<br>Date of operation | Ongoing issues | XRay- Pending<br>Blds- 22/01: Hb 99,<br>eGFR >90 (Tx 4 units) |                                                                    | TTA <input type="checkbox"/>            |
| 9  | Surname, firstname<br>dd/mm/yyyy<br>Hospital number | Consultant<br>Operation<br>Date of operation | Ongoing issues | XRay- OK<br>Blds- 23/01: Hb 113,<br>eGFR >90                  |                                                                    | TTA <input checked="" type="checkbox"/> |
| 31 | Surname, firstname<br>dd/mm/yyyy<br>Hospital number | Consultant<br>Operation<br>Date of operation | Ongoing issues | XRay- OK<br>Blds- 23/01: Hb 103,<br>eGFR 44, Na 131           | Stop fluid restriction on SAT. Blds<br>Sun to check renal function | TTA <input type="checkbox"/>            |
| 4  | Surname, firstname<br>dd/mm/yyyy<br>Hospital number | Consultant<br>Operation<br>Date of operation | Ongoing issues | XRay- Requested<br>Blds- Requested                            |                                                                    | TTA <input type="checkbox"/>            |

Ward 7b

|    |                                                     |                                              |                |                              |  |                              |
|----|-----------------------------------------------------|----------------------------------------------|----------------|------------------------------|--|------------------------------|
| 55 | Surname, firstname<br>dd/mm/yyyy<br>Hospital number | Consultant<br>Operation<br>Date of operation | Ongoing issues | XRay- booked<br>Blds- booked |  | TTA <input type="checkbox"/> |
|----|-----------------------------------------------------|----------------------------------------------|----------------|------------------------------|--|------------------------------|

Ward L3 Medrooms

|  |                                                     |                                              |                |                |  |                                         |
|--|-----------------------------------------------------|----------------------------------------------|----------------|----------------|--|-----------------------------------------|
|  | Surname, firstname<br>dd/mm/yyyy<br>Hospital number | Consultant<br>Operation<br>Date of operation | Ongoing issues | XRay-<br>Blds- |  | TTA <input checked="" type="checkbox"/> |
|--|-----------------------------------------------------|----------------------------------------------|----------------|----------------|--|-----------------------------------------|

# Clinic 40400    Clinic FY1 1527/ SHO 2283 / SPR 3750 / Twilight SHO 9502    Gate 25a 43910/43911    Gate 25b 43103/43104    Xray 41121    Porters 34050/35555  
 # clinic fax 01174 149488    Team A FY1 #1602/FY2 #1223    Gate 26a 41333/41334    Gate 26b 44000/44001    OOH radiographer 1247    Plastics SHO #1311  
 Plaster room 48600/11507    Team B FY1 #1578/FY2 #9382/ CT1#1550/ CF#1679    Gate 7a 44400/44401    Gate 7b 41330/41331    Radiology Spr 41119    Medical SPR #1777  
 Trauma theatre 41003/41004    Team C FY1 #1506/FY2 # 1130    Gate 9a 46300/46301    Gate 9b 43300/43301    CT 41120    Transfusion 35630  
 ED reception 44100/45675/45676    Team D FY1 #1333/FY2#1196    Major trauma nurse 41540    MRI 41250/49045/49046    Micro SPR 32656 (bleep 9446)  
 ED majors 44104/44105/44115    Spinal F1 #1886/SHO#1885    USS 02321/45811/45812    Path lab 38383
